# Supplementary material for: Atmospheric pollution from ships and its impact on local air quality at a port site in Shanghai
Source: Copernicus journal article supplement (doi:10.5194/acp-19-6315-2019), 2019-05-14
Supplement: Supplementary file 1 [file acp-19-6315-2019-supplement.pdf]

Supplement of Atmos. Chem. Phys., 19, 6315–6330, 2019  
<https://doi.org/10.5194/acp-19-6315-2019-supplement>  
© Author(s) 2019. This work is distributed under  
the Creative Commons Attribution 4.0 License.

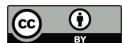

*Supplement of*

## **Atmospheric pollution from ships and its impact on local air quality at a port site in Shanghai**

**Xinning Wang et al.**

*Correspondence to:* Qingyan Fu ([qingyanf@sheemc.cn](mailto:qingyanf@sheemc.cn))

The copyright of individual parts of the supplement might differ from the CC BY 4.0 License.

1 **1. Wind rose of the port site during the study**

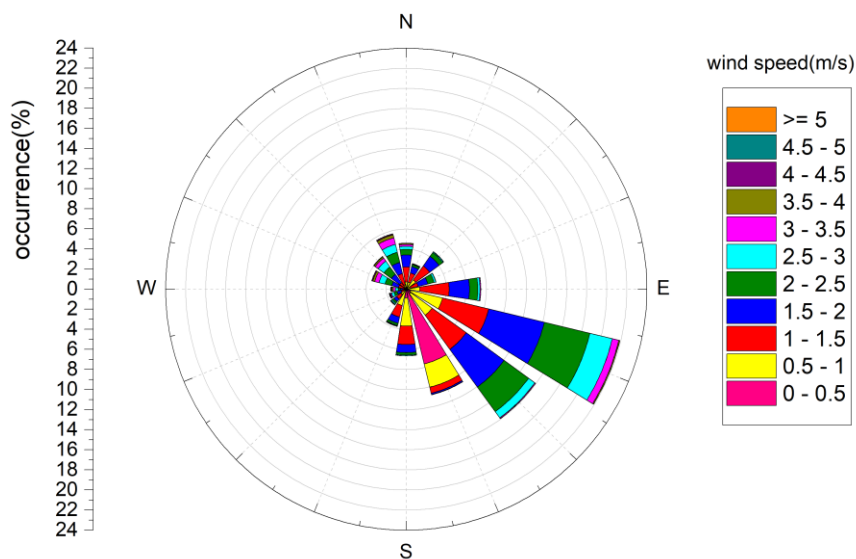

2

3

Figure S1. Portside wind rose during the study period.

4

5 **2. Explanation of identification method of ship emission particles**

6 The identification method relying on Vanadium signatures left a problem that this method  
7 lose some portion of shipping emission particles which produce no or insignificant Vanadium  
8 peaks (Xiao et al., 2018) . However, within the analyzing capability of SPAMS, Vanadium  
9 signatures are still the most reliable indicator of shipping emission particles in a real ambient  
10 condition. The present site in port area is both influenced by emission sources from the shipping  
11 activities and traffics on land. Single particle signature from diesel vehicles has displayed some  
12 similarity with shipping emission (especially for low Sulfur fuel oil, like MGO, IFO) because of the  
13 resemblance in chemical composition between them (Toner et al., 2008;Xiao et al., 2018). In this  
14 situation, to identify 'true' shipping emission particles from total particles will became difficult or  
15 even impossible if we discard the reliable clue of Vanadium. In this supplementary material we  
16 illustrate the wind roses of several particle clusters of similar composition with the only major  
17 difference of Vanadium (Figure S2). From the figure it is clear that single particles with Vanadium  
18 is an ideal indication of shipping emission source from port directions, while the exclusion of  
19 Vanadium will only result an unwanted interferences of particles from land sources. Therefore, in  
20 present study the online single particle measurement, together with synchronous SO<sub>2</sub>

- 1 concentration, was utilized to indicate the occurrence of shipping emission plumes, not to dig out
- 2 every shipping emission particles.

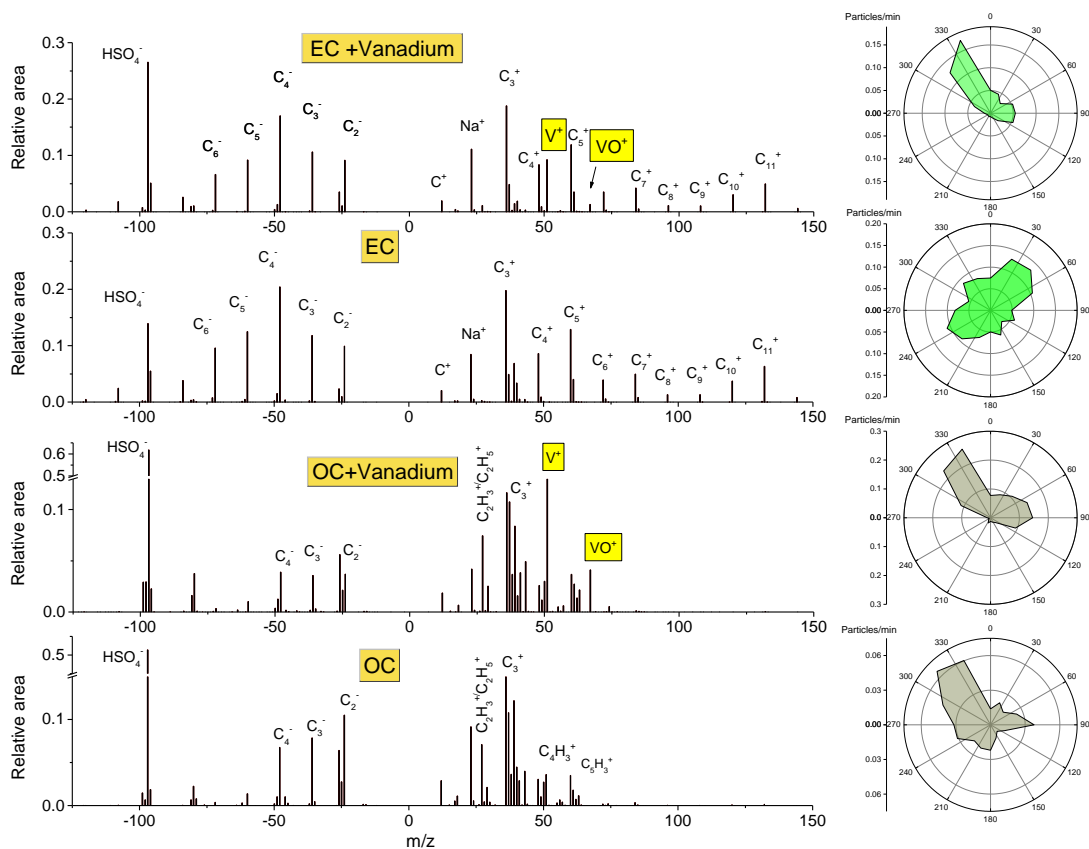

3  
4 Figure S2. Mass spectra and wind roses of representative particle clusters with and without  
5 vanadium peaks.

6 **3. Temporal variation of  $PM_{2.5}$ , vanadium particles,  $SO_2$  concentrations in the portside during a**  
7 **period from Jul-03 to Jul-06.**

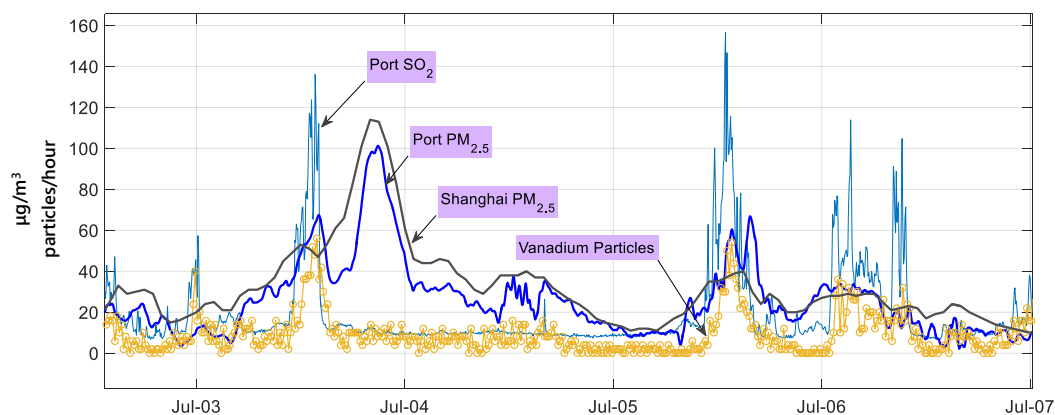

8  
9 Figure S3. Temporal variations of  $SO_2$ ,  $PM_{2.5}$ , vanadium particles numbers in port site and  $PM_{2.5}$   
10 in Shanghai city from Jul-03 to Jul-06.

1 **4. Spatial distribution of PM<sub>2.5</sub> concentrations in Shanghai area**

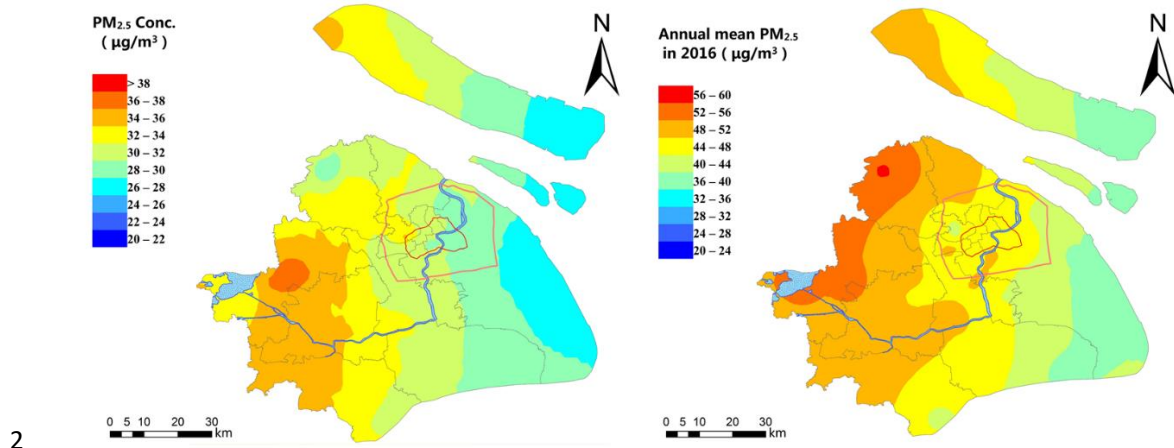

3 Figure S4. Spatial distributions of PM<sub>2.5</sub> in Shanghai area in the study period (left) and in 2016  
4 (right).

5 **References**

6 Toner, S. M., Shields, L. G., Sodeman, D. A., and Prather, K. A.: Using mass spectral source signatures to  
7 apportion exhaust particles from gasoline and diesel powered vehicles in a freeway study using  
8 UF-ATOFMS, *Atmospheric Environment*, 42, 568-581, 10.1016/j.atmosenv.2007.08.005, 2008.

9 Xiao, Q., Li, M., Liu, H., Deng, F., Fu, M., Man, H., Jin, X., Liu, S., Lv, Z., and He, K.: Characteristics of  
10 marine shipping emissions at berth: profiles for PM and VOCs, *Atmos. Chem. Phys. Discuss.*, 2018,  
11 1-29, 10.5194/acp-2017-1132, 2018.

12

13
